# Supplementary material for: Investigating the Relationship between Eating Speed, Body Composition, and Physical Activity: A Cross-Sectional Analysis in Gujarat, India
Source: Research Square preprint supplement (doi:10.21203/rs.3.rs-7289812/v1), 2025-09-10
Supplement: Supplementary file 1 [file b89157ae0b36fa6d9e483eeb.docx]

**Questionnaire**

**Informed Consent Form**

**INSTITUTIONAL ETHICS COMMITTEE - 2**

**HM PATEL CENTER FOR MEDICAL CARE AND EDUCATION, KARAMSAD**

Study Title: Relationship between eating speed, body composition and physical activity.

Study Number [if present]:

Participant’s Initials: _______________ Participant’s Name: ______________________

Date of Birth / Age: _________________

|  |  | Please initial box | |
| --- | --- | --- | --- |
| (i) | I confirm that I have read and understood the information sheet dated _______ for the above study and have had the opportunity to ask questions. | | [ ] |
| (ii) | I understand that my participation in the study is voluntary and that I am free to withdraw at any time, without giving any reason, without my medical care or legal rights being affected. | | [ ] |
| (iii) | I understand that the investigators part of this project, the Ethics Committee and the regulatory authorities will not need my permission to look at my health/ academic records both in respect of the current study and any further research that may be conducted in relation to it, even if I withdraw from the trial. I agree to this access. However, I understand that my identity will not be revealed in any information released to third parties or published. | | [ ] |
| (iv) | I agree not to restrict the use of any data or results that arise from this study provided such a use is only for scientific purpose(s) | | [ ] |
| (v) | I agree to take part in the above study. | | [ ] |
|  |  |  |  |

Signature of the participant/ legally accepted representative___________

Date:_____/_____/______

Signatory’sName: _________________________________________________________________

Signature of the Investigator: ____________________________ Date: _____/_____/______

StudyInvestigator’s Name: __________________________________________________________

Signature of the Witness ______________________ Date:_____/_____/_______

Name of the witness

**Eating speed questionnaire**

1. Do you often feel that you finish your meal before your family members while eating with them?
2. Yes
3. No
4. How much time do you take to complete your meal at a time?
5. < 10 minutes
6. 10-15 minutes
7. 15-20 minutes
8. >20 minutes
9. How many times do you chew per bites?
10. < 10 chews per bite
11. 10-20 chews per bite
12. > 20 chews per bite
13. Rate your own speed of drinking water.
14. Slow
15. Normal
16. Fast
17. Do you take your meals regularly?
18. Always
19. Often
20. Sometimes
21. Never
22. Do you take breakfast?
23. Always
24. Often
25. Sometimes
26. Never
27. How many times do you eat your meals, except snacks?
28. 1 time
29. 2 times
30. 3 times
31. 4 times
32. How often do you eat fried food?
33. Daily
34. 1-2 times per week
35. 3-4 times per week
36. Occasionally
37. How many do you eat junk food in a week?
38. Often
39. Occasionally
40. Sometimes
41. Rarely

# INTERNATIONAL PHYSICAL ACTIVITY QUESTIONNAIRE

We are interested in finding out about the kinds of physical activities that people do as part of their everyday lives. The questions will ask you about the time you spent being physically active in the **last 7 days**. Please answer each question even if you do not consider yourself to be an active person. Please think about the activities you do at work, as part of your house and yard work, to get from place to place, and in your spare time for recreation, exercise or sport.

Think about all the **vigorous** activities that you did in the **last 7 days**. **Vigorous** physical activities refer to activities that take hard physical effort and make you breathe much harder than normal. Think *only* about those physical activities that you did for at least 10 minutes at a time.

1. During the **last 7 days**, on how many days did you do **vigorous** physical activities like heavy lifting, digging, aerobics, or fast bicycling?

## _____ days per week

No vigorous physical activities ***Skip to question 3***

2. How much time did you usually spend doing **vigorous** physical activities on one of those days?

## _____ hours per day _____ minutes per day

Don’t know/Not sure

Think about all the **moderate** activities that you did in the **last 7 days**. **Moderate** activities refer to activities that take moderate physical effort and make you breathe somewhat harder than normal. Think only about those physical activities that you did for at least 10 minutes at a time.

3. During the **last 7 days**, on how many days did you do **moderate** physical activities like carrying light loads, bicycling at a regular pace, or doubles tennis? Do not include walking.

## _____ days per week

No moderate physical activities ***Skip to question 5***

4. How much time did you usually spend doing **moderate** physical activities on one of those days?

## _____ hours per day _____ minutes per day

Don’t know/Not sure

Think about the time you spent **walking** in the **last 7 days**. This includes at work and at home, walking to travel from place to place, and any other walking that you have done solely for recreation, sport, exercise, or leisure.

5. During the **last 7 days**, on how many days did you **walk** for at least 10 minutes at a time?

## _____ days per week

No walking***Skip to question 7***

6. How much time did you usually spend **walking** on one of those days?

## _____ hours per day _____ minutes per day

Don’t know/Not sure

The last question is about the time you spent **sitting** on weekdays during the **last 7 days**. Include time spent at work, at home, while doing course work and during leisure time. This may include time spent sitting at a desk, visiting friends, reading, or sitting or lying down to watch television.

7. During the **last 7 days**, how much time did you spend **sitting** on a **week day**?

## _____ hours per day _____ minutes per day

Don’t know/Not sure

**This is the end of the questionnaire, thank you for participating.**
